# Supplementary material
Source: Research Square preprint supplement (doi:10.21203/rs.3.rs-9059978/v1)
Supplement: Supplementary file 1 [file b54dca308c246e0048aef174.docx]

Table: Primer and Probes for Real-time PCR

| **Gene** | **Primers/**  **Probes** | **Sequence** | **Amplicon**  **Size (bp)** | **Annealing**  **Tempt** | **References** |
| --- | --- | --- | --- | --- | --- |
| OXA-48 | Forward | 5′-CTTAAACGGGCGAACCAAGC-3′ | 101 | 55 oC | Lund *et al* [1] |
| Reverse | 5′- GTTCATCCTTAACCACGCCC-3′ |
| Probe | **6-FAM**-TTCCCAATAGCTTGATCGCCCTCGATT-**BHQ** |
| VIM | Forward | 5′- -GATTGATACAGCGTGGGGTG-3′ | 204 | 54 oC | Lund *et al* [1] |
| Reverse | 5′- -AGGGCGATGCGTACGTCGC-3′ |
| Probe | **Cy5**-GACGCGGTCGTCATGAAAGTGCGT-**BHQ** |
| KPC | Forward | 5′- -CACTGTGCAGCTCATTCAAGG-3′ | 309 | 58 oC | Lund *et al* [1] |
| Reverse | 5′- -CGCCGATAGAGCGCATGAA-3′ |
| Probe | **LC610**-CTGCCGCTGTGCTGGCTCGCA-**BHQ** |
| NDM-1 | Forward | 5′- -GCAAATGGAAACTGGCGACC -3′ | 541 | 56 oC | Lund *et al* [1] |
| Reverse | 5′--TACCGCCCATCTTGTCCTGA-3′ |
| Probe | **VIC-**TCGCACCGAATGTCTGGCAGCACA-**MGB** |

Quality control plots for the DNA purification used for WGS


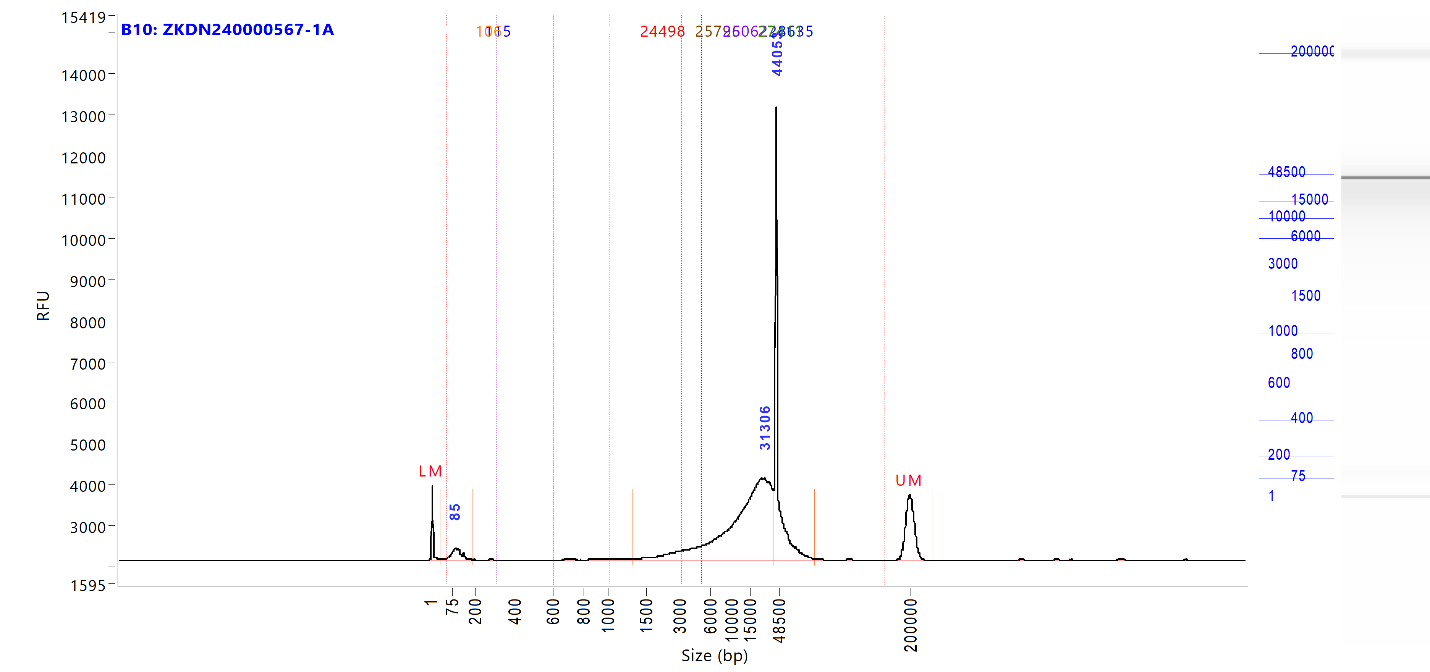


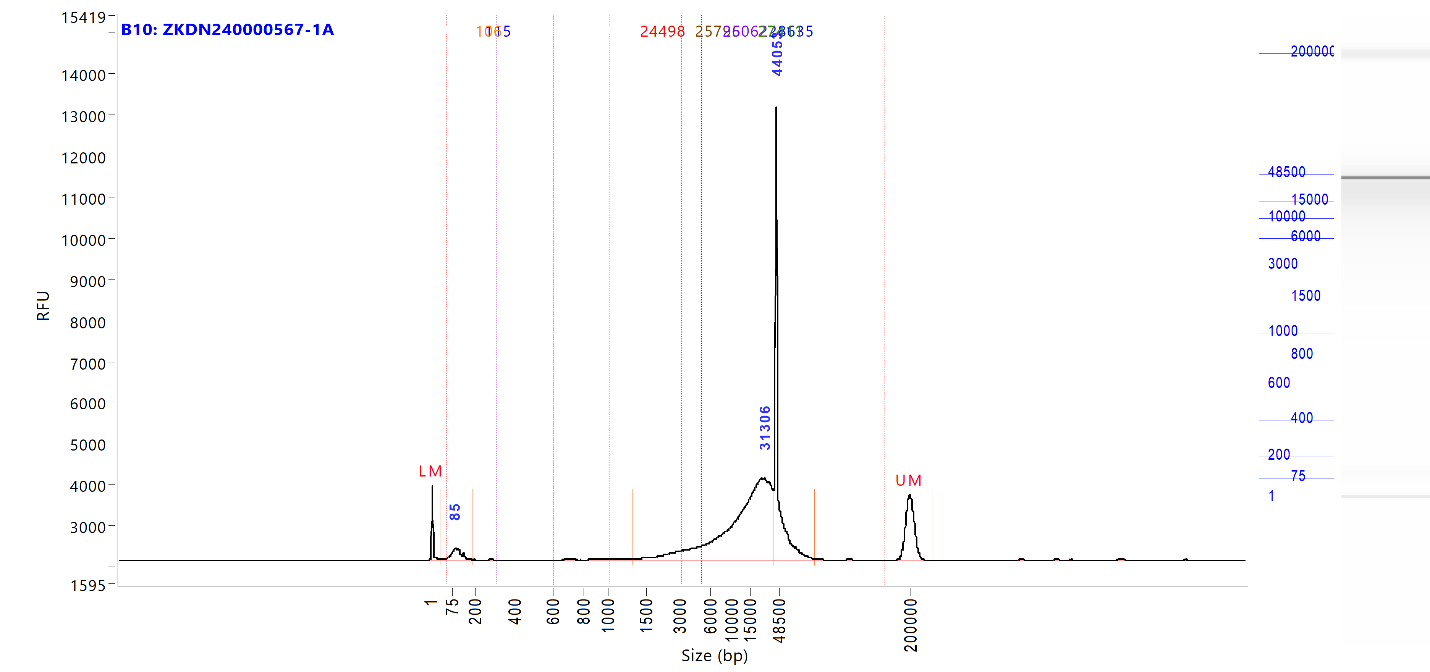


Genes Application plots


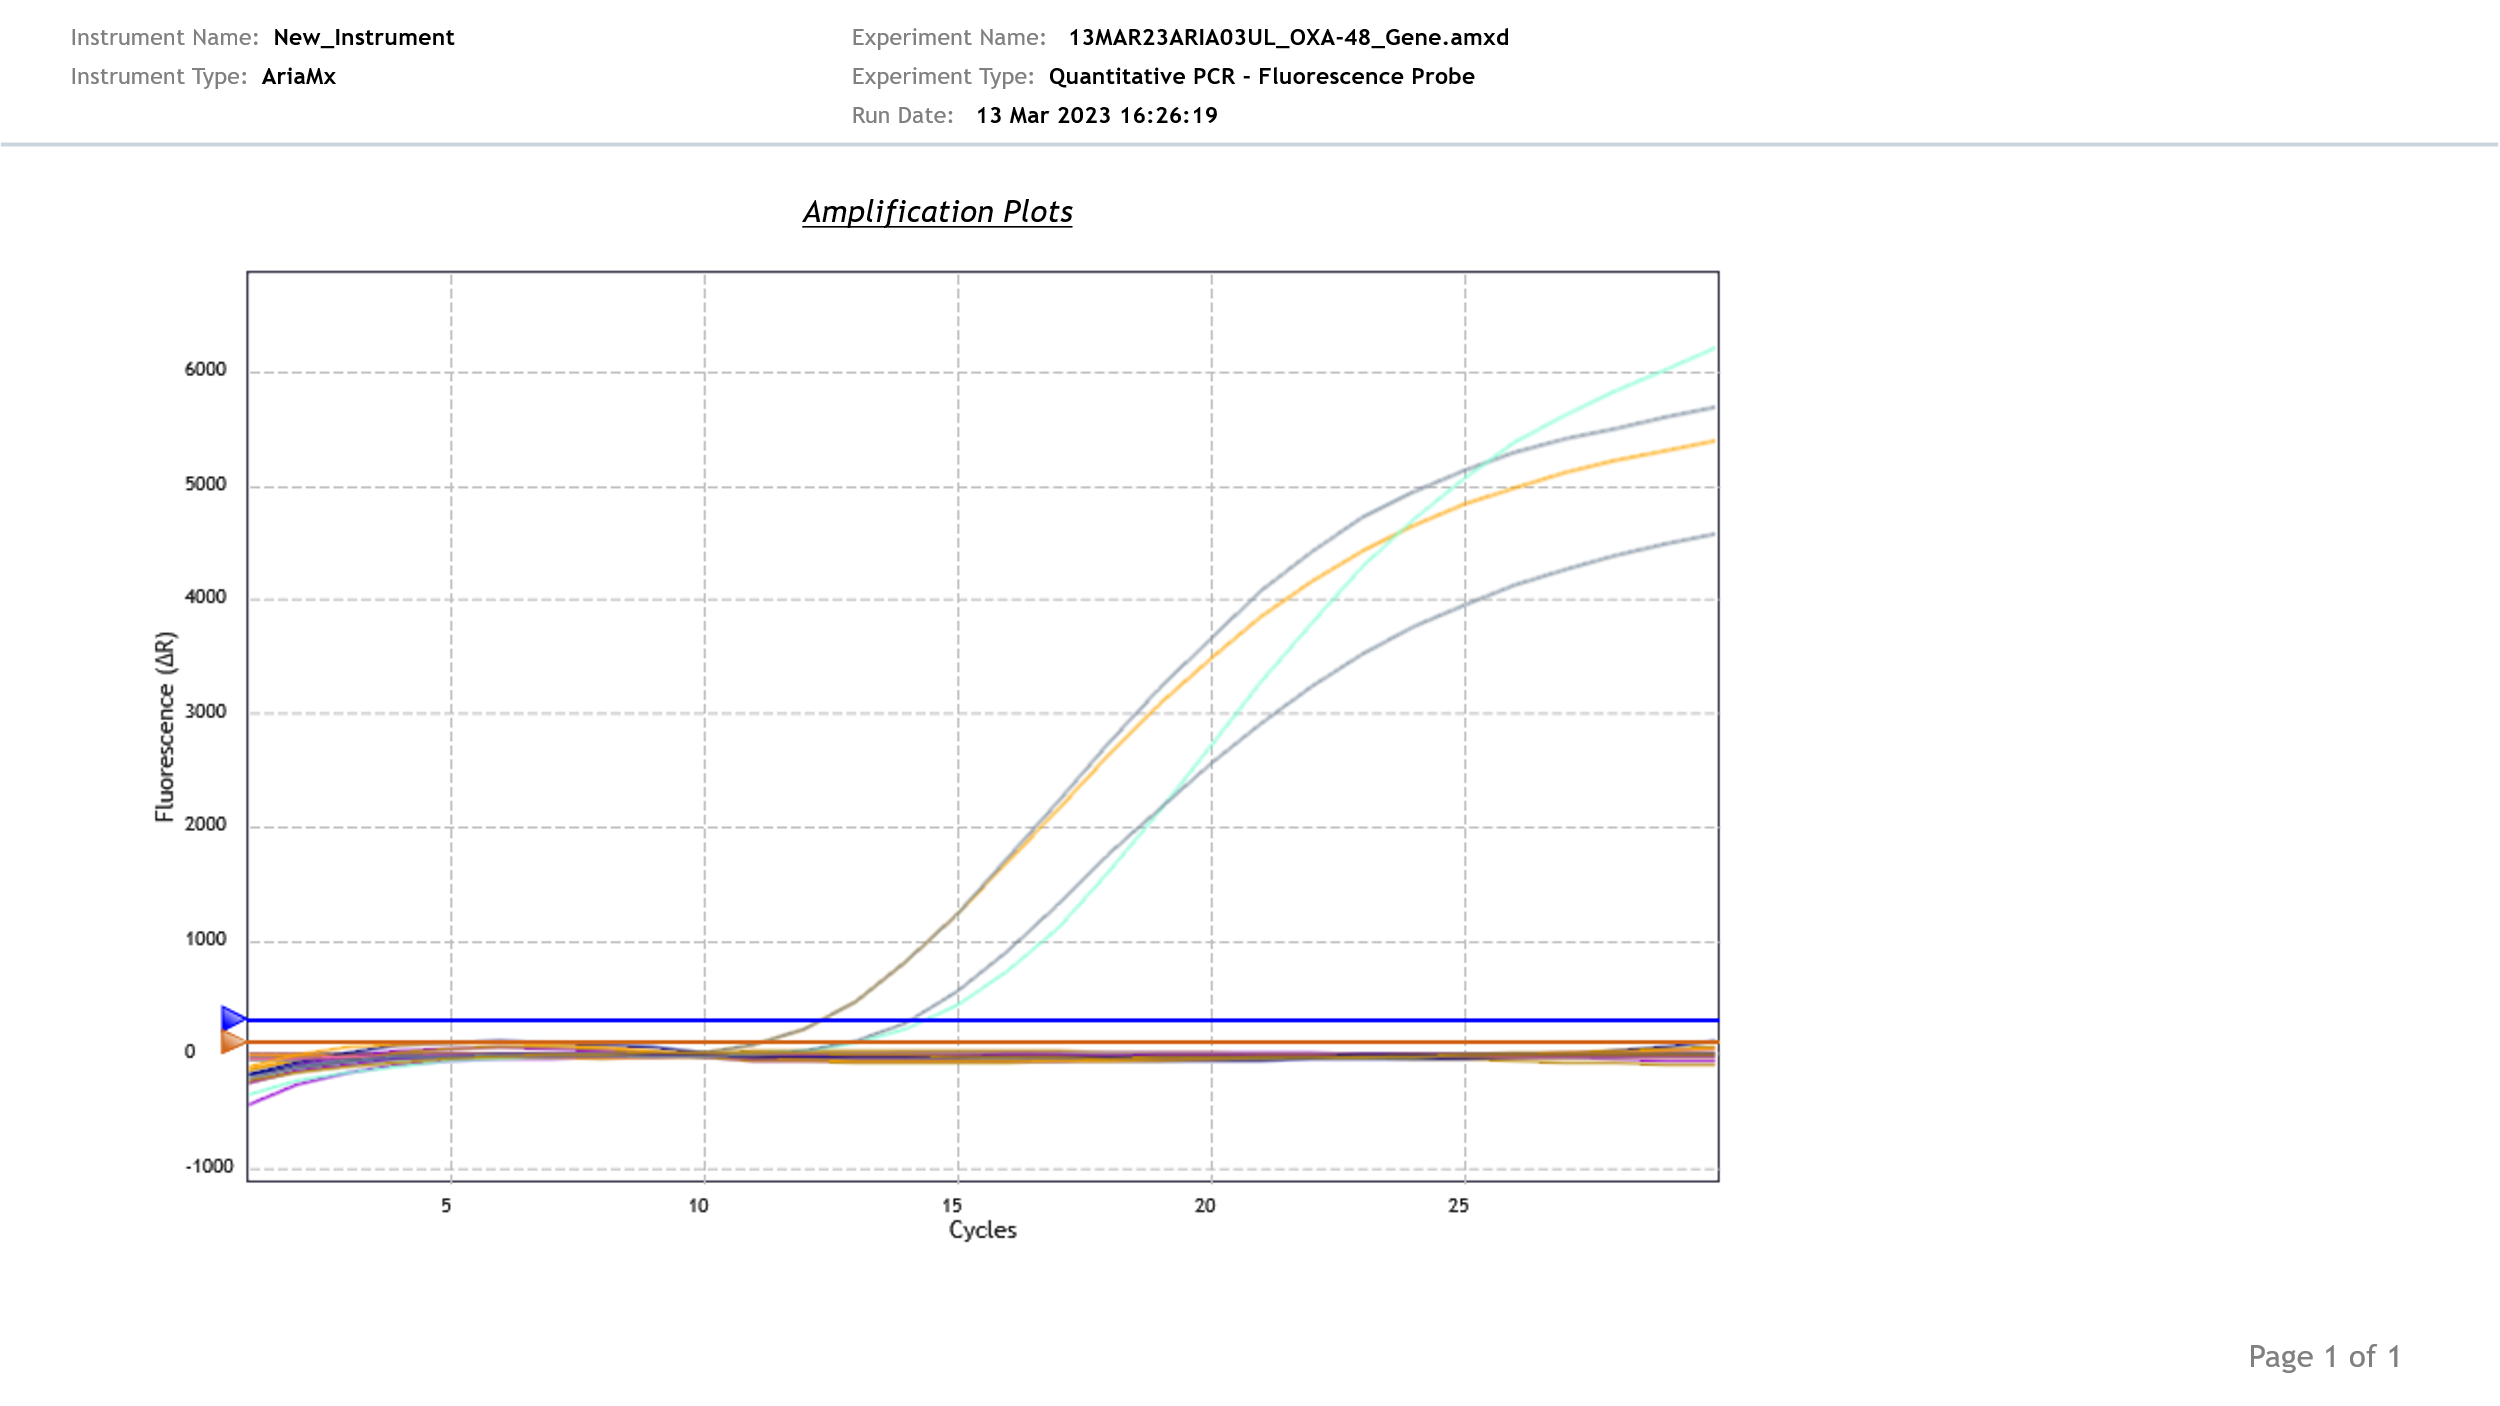


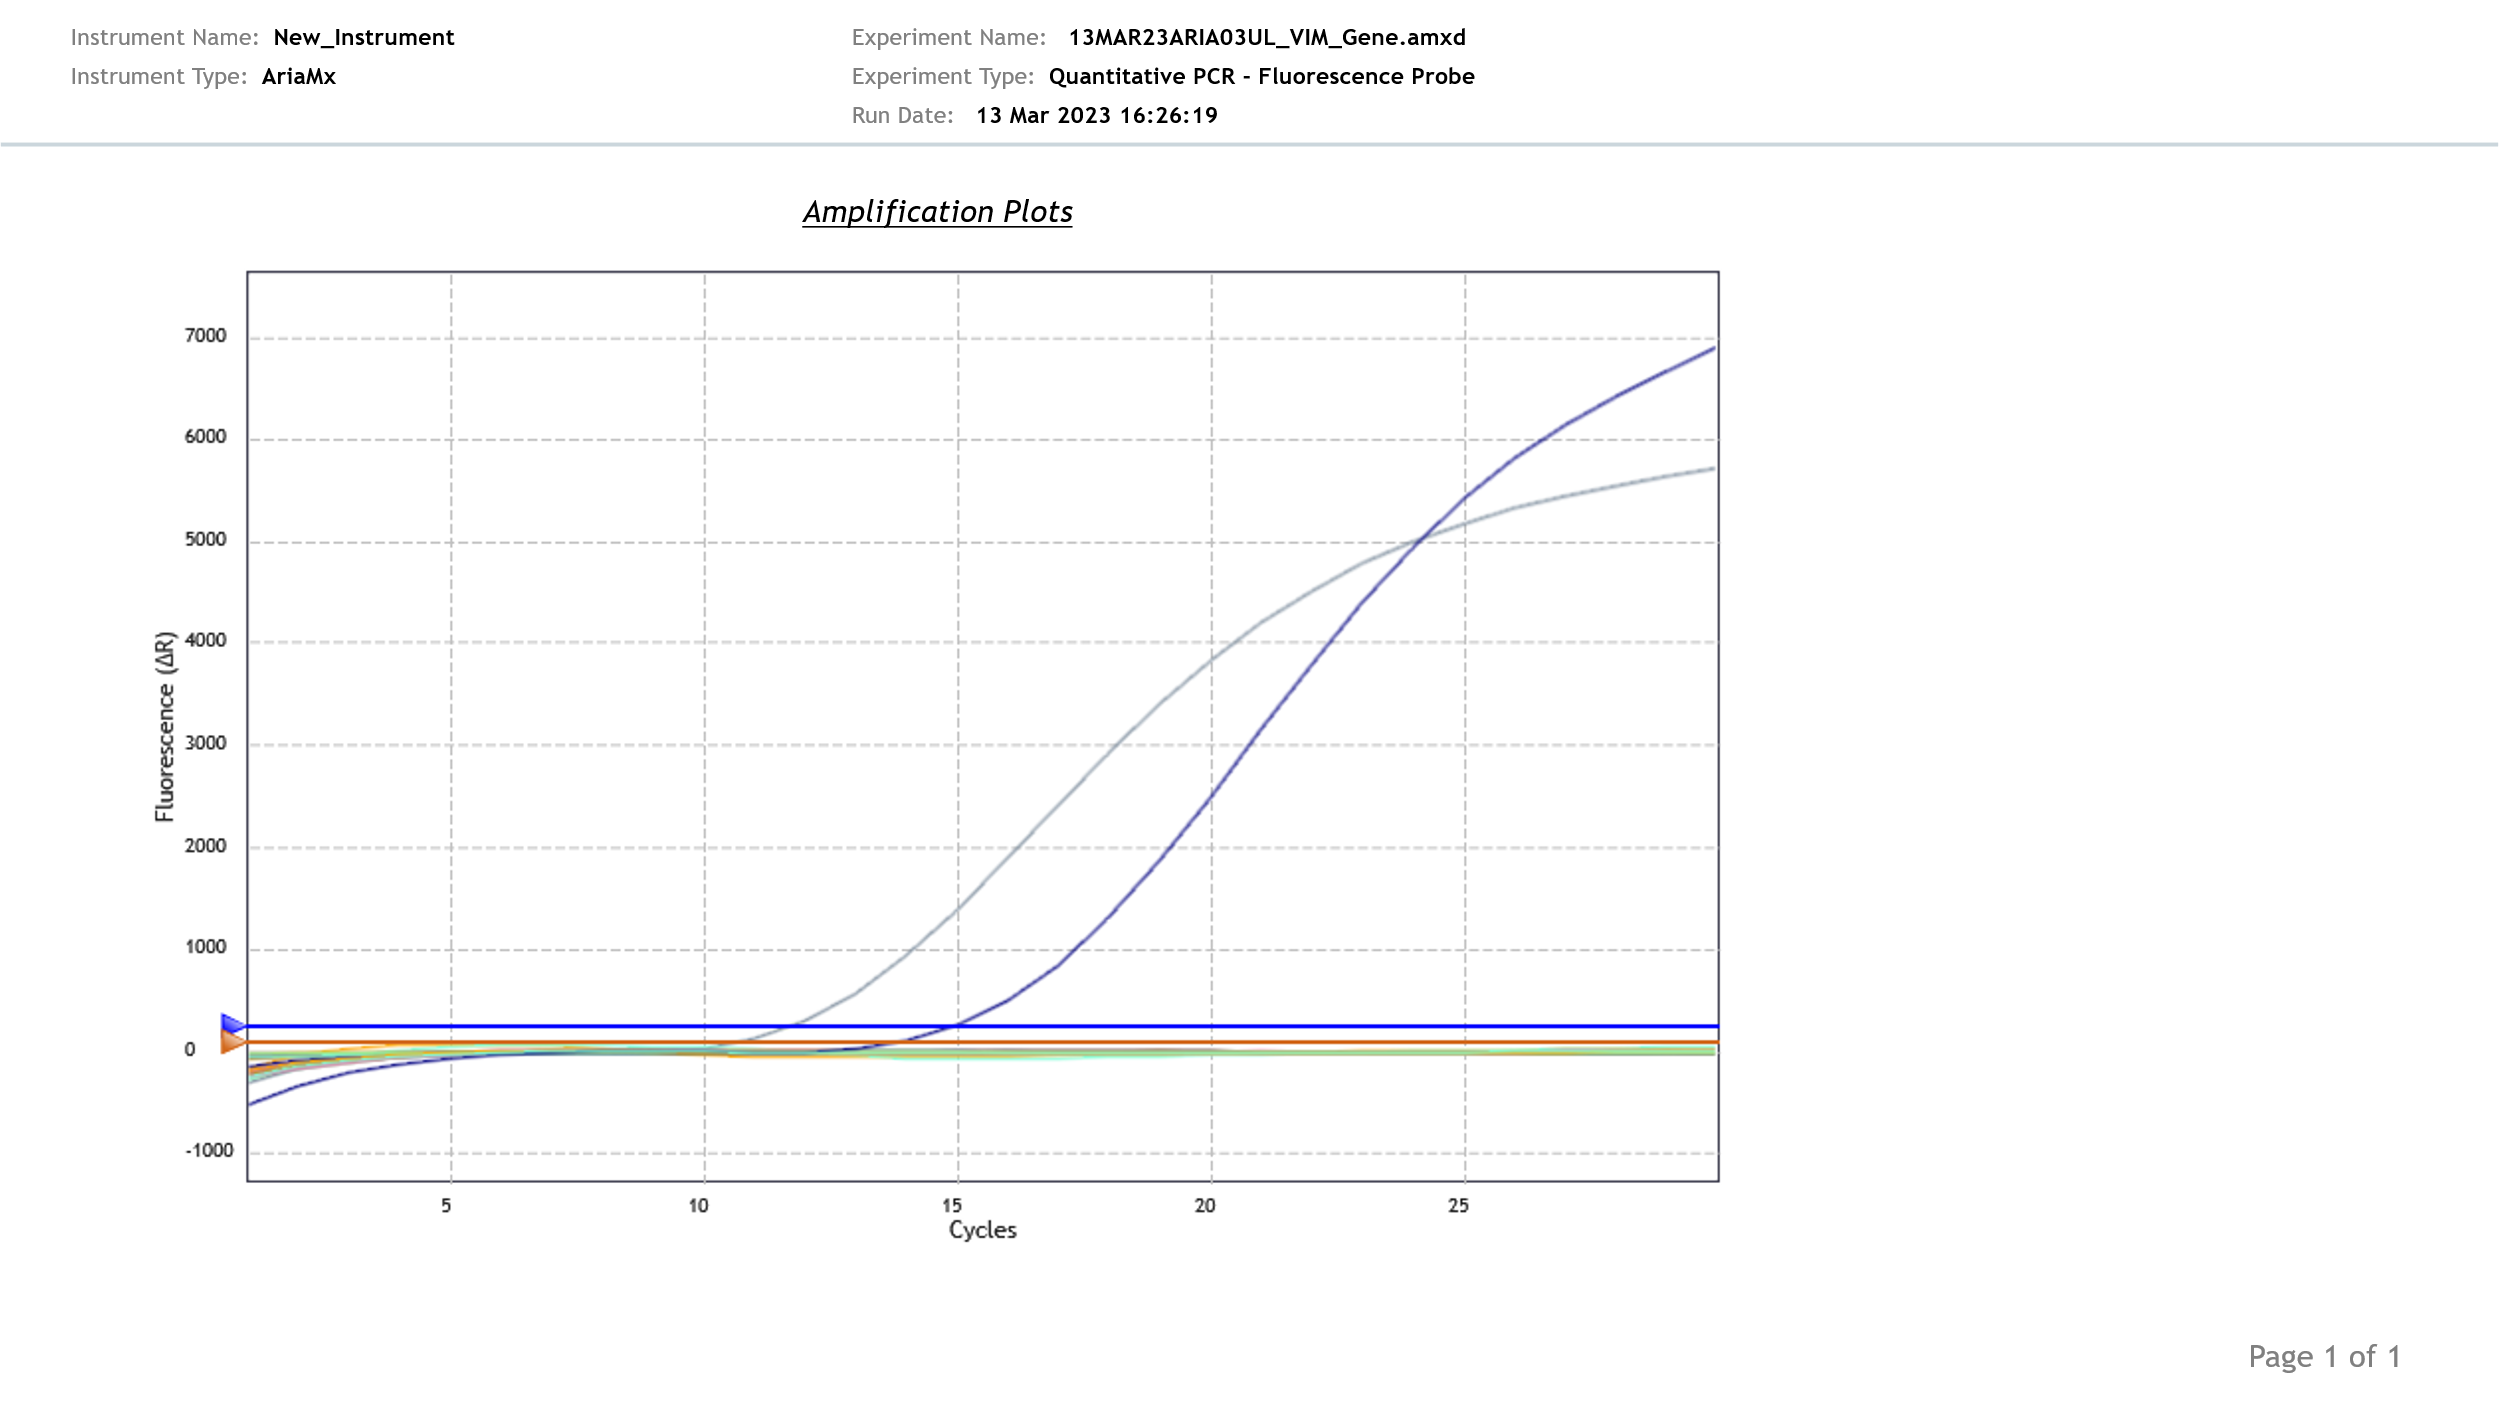


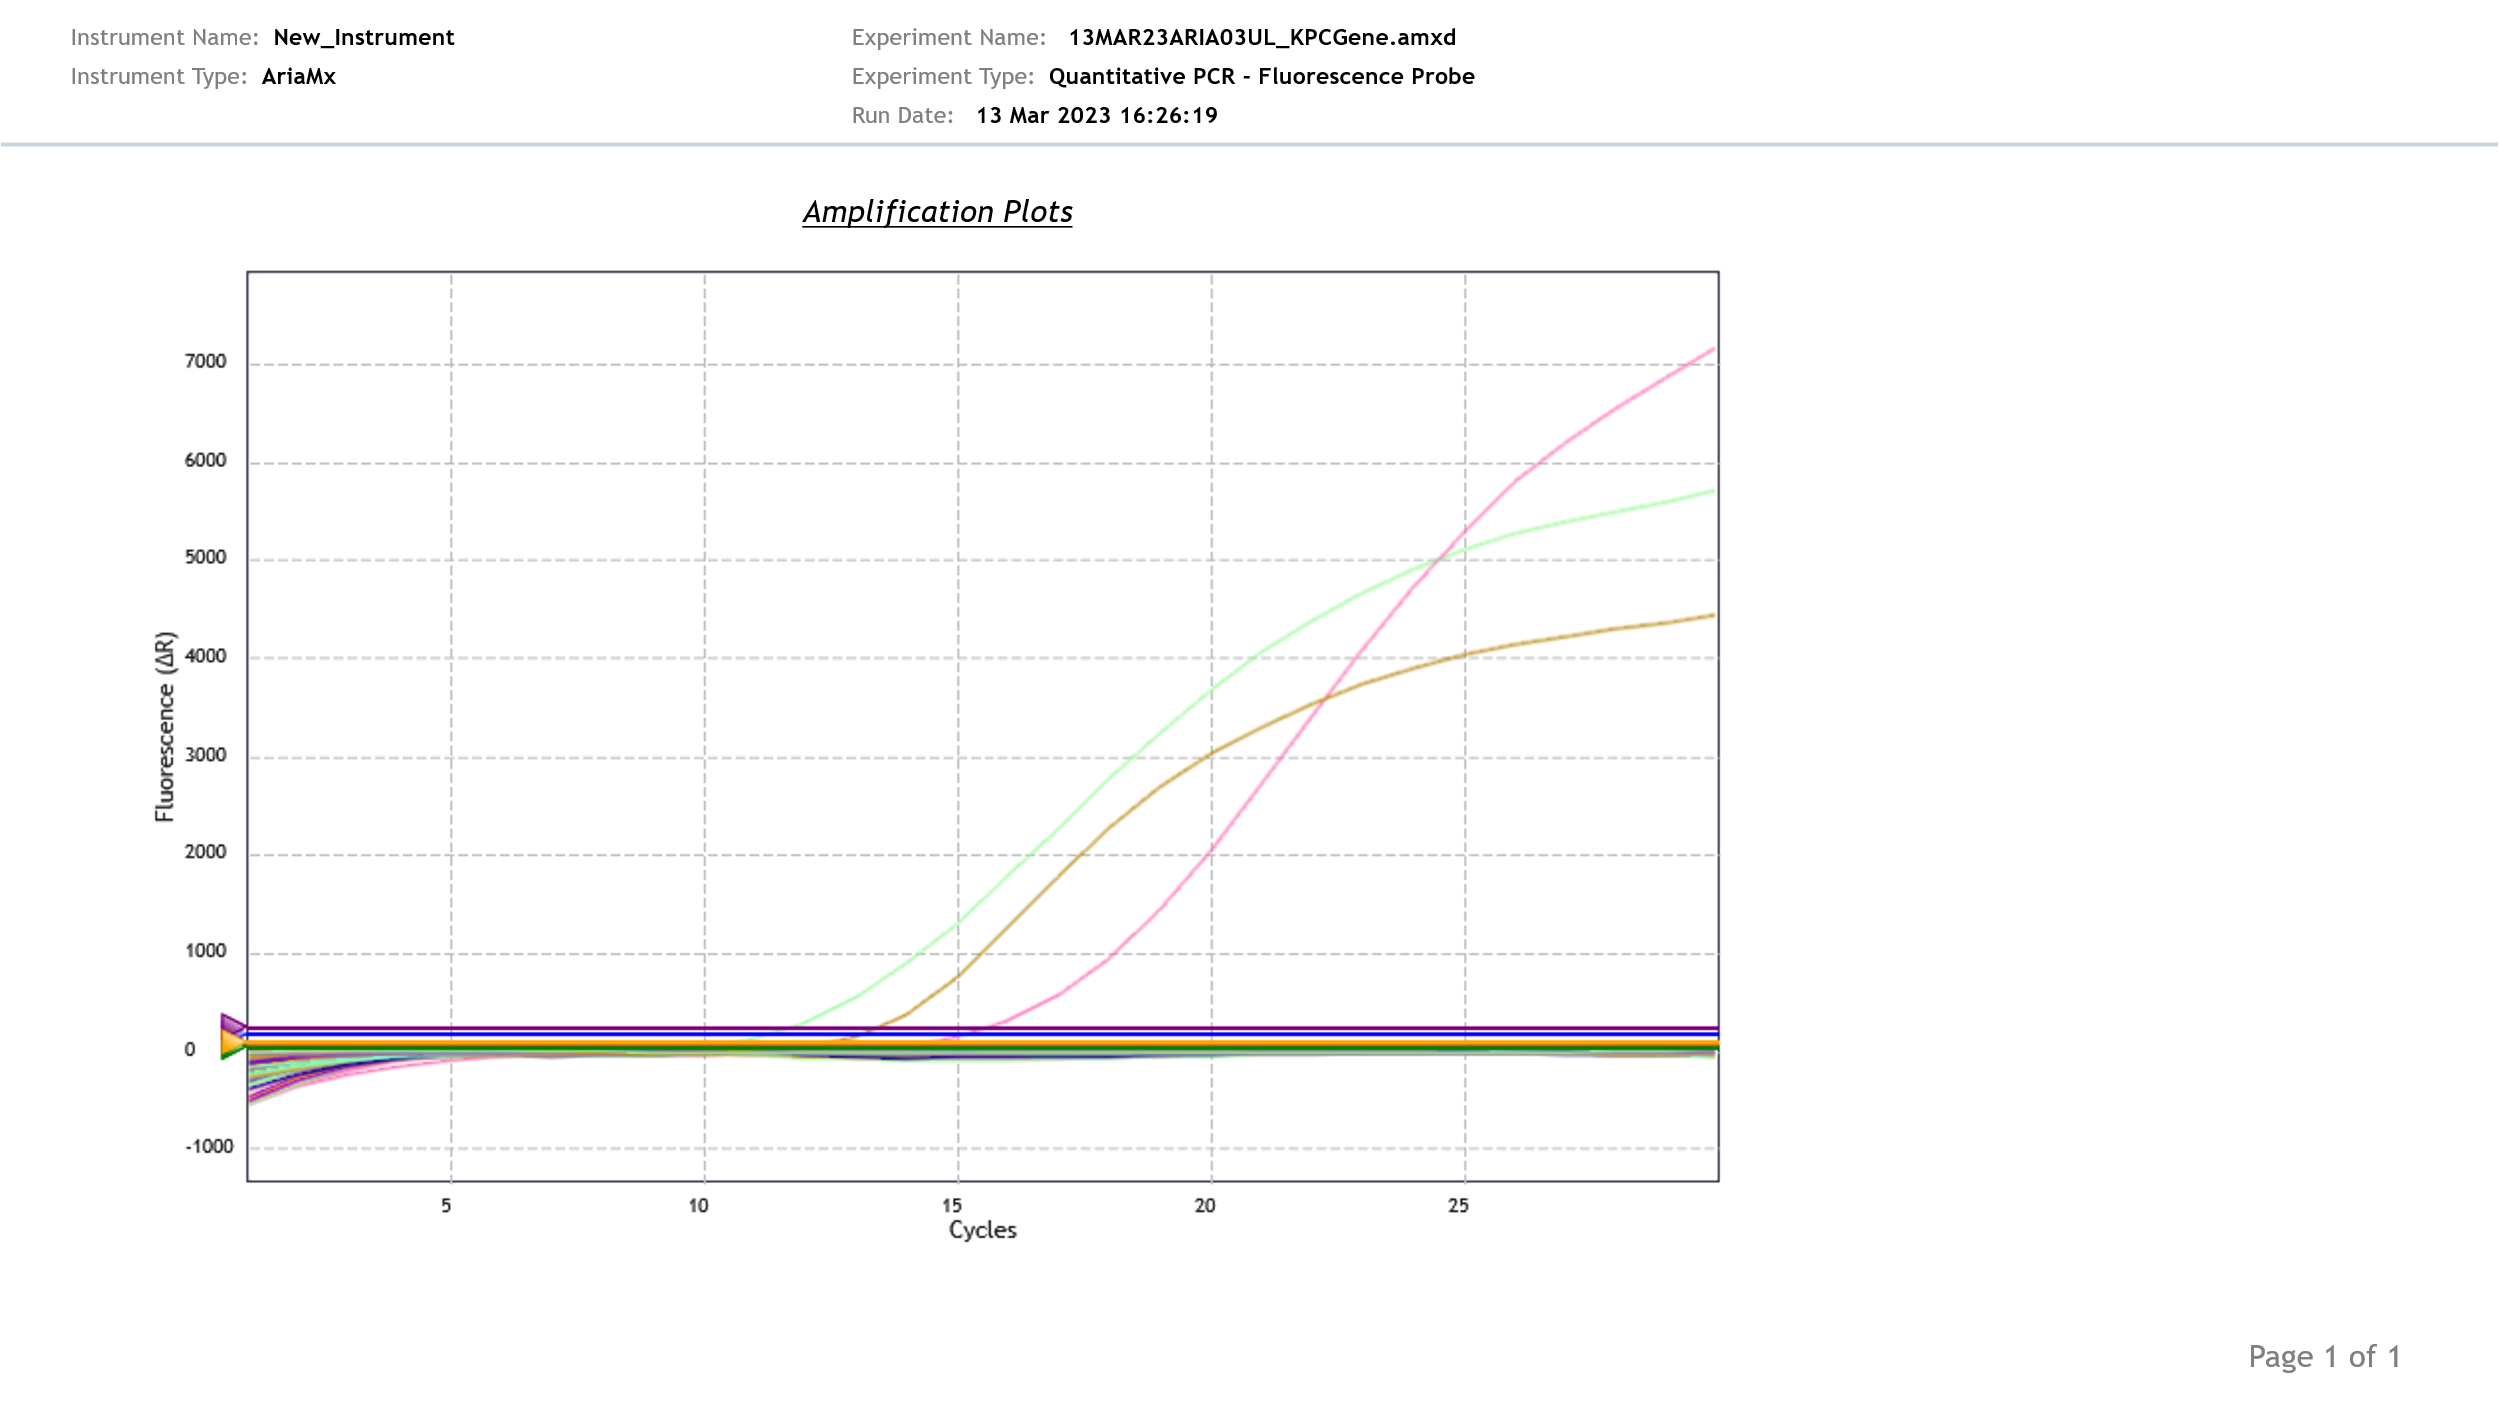


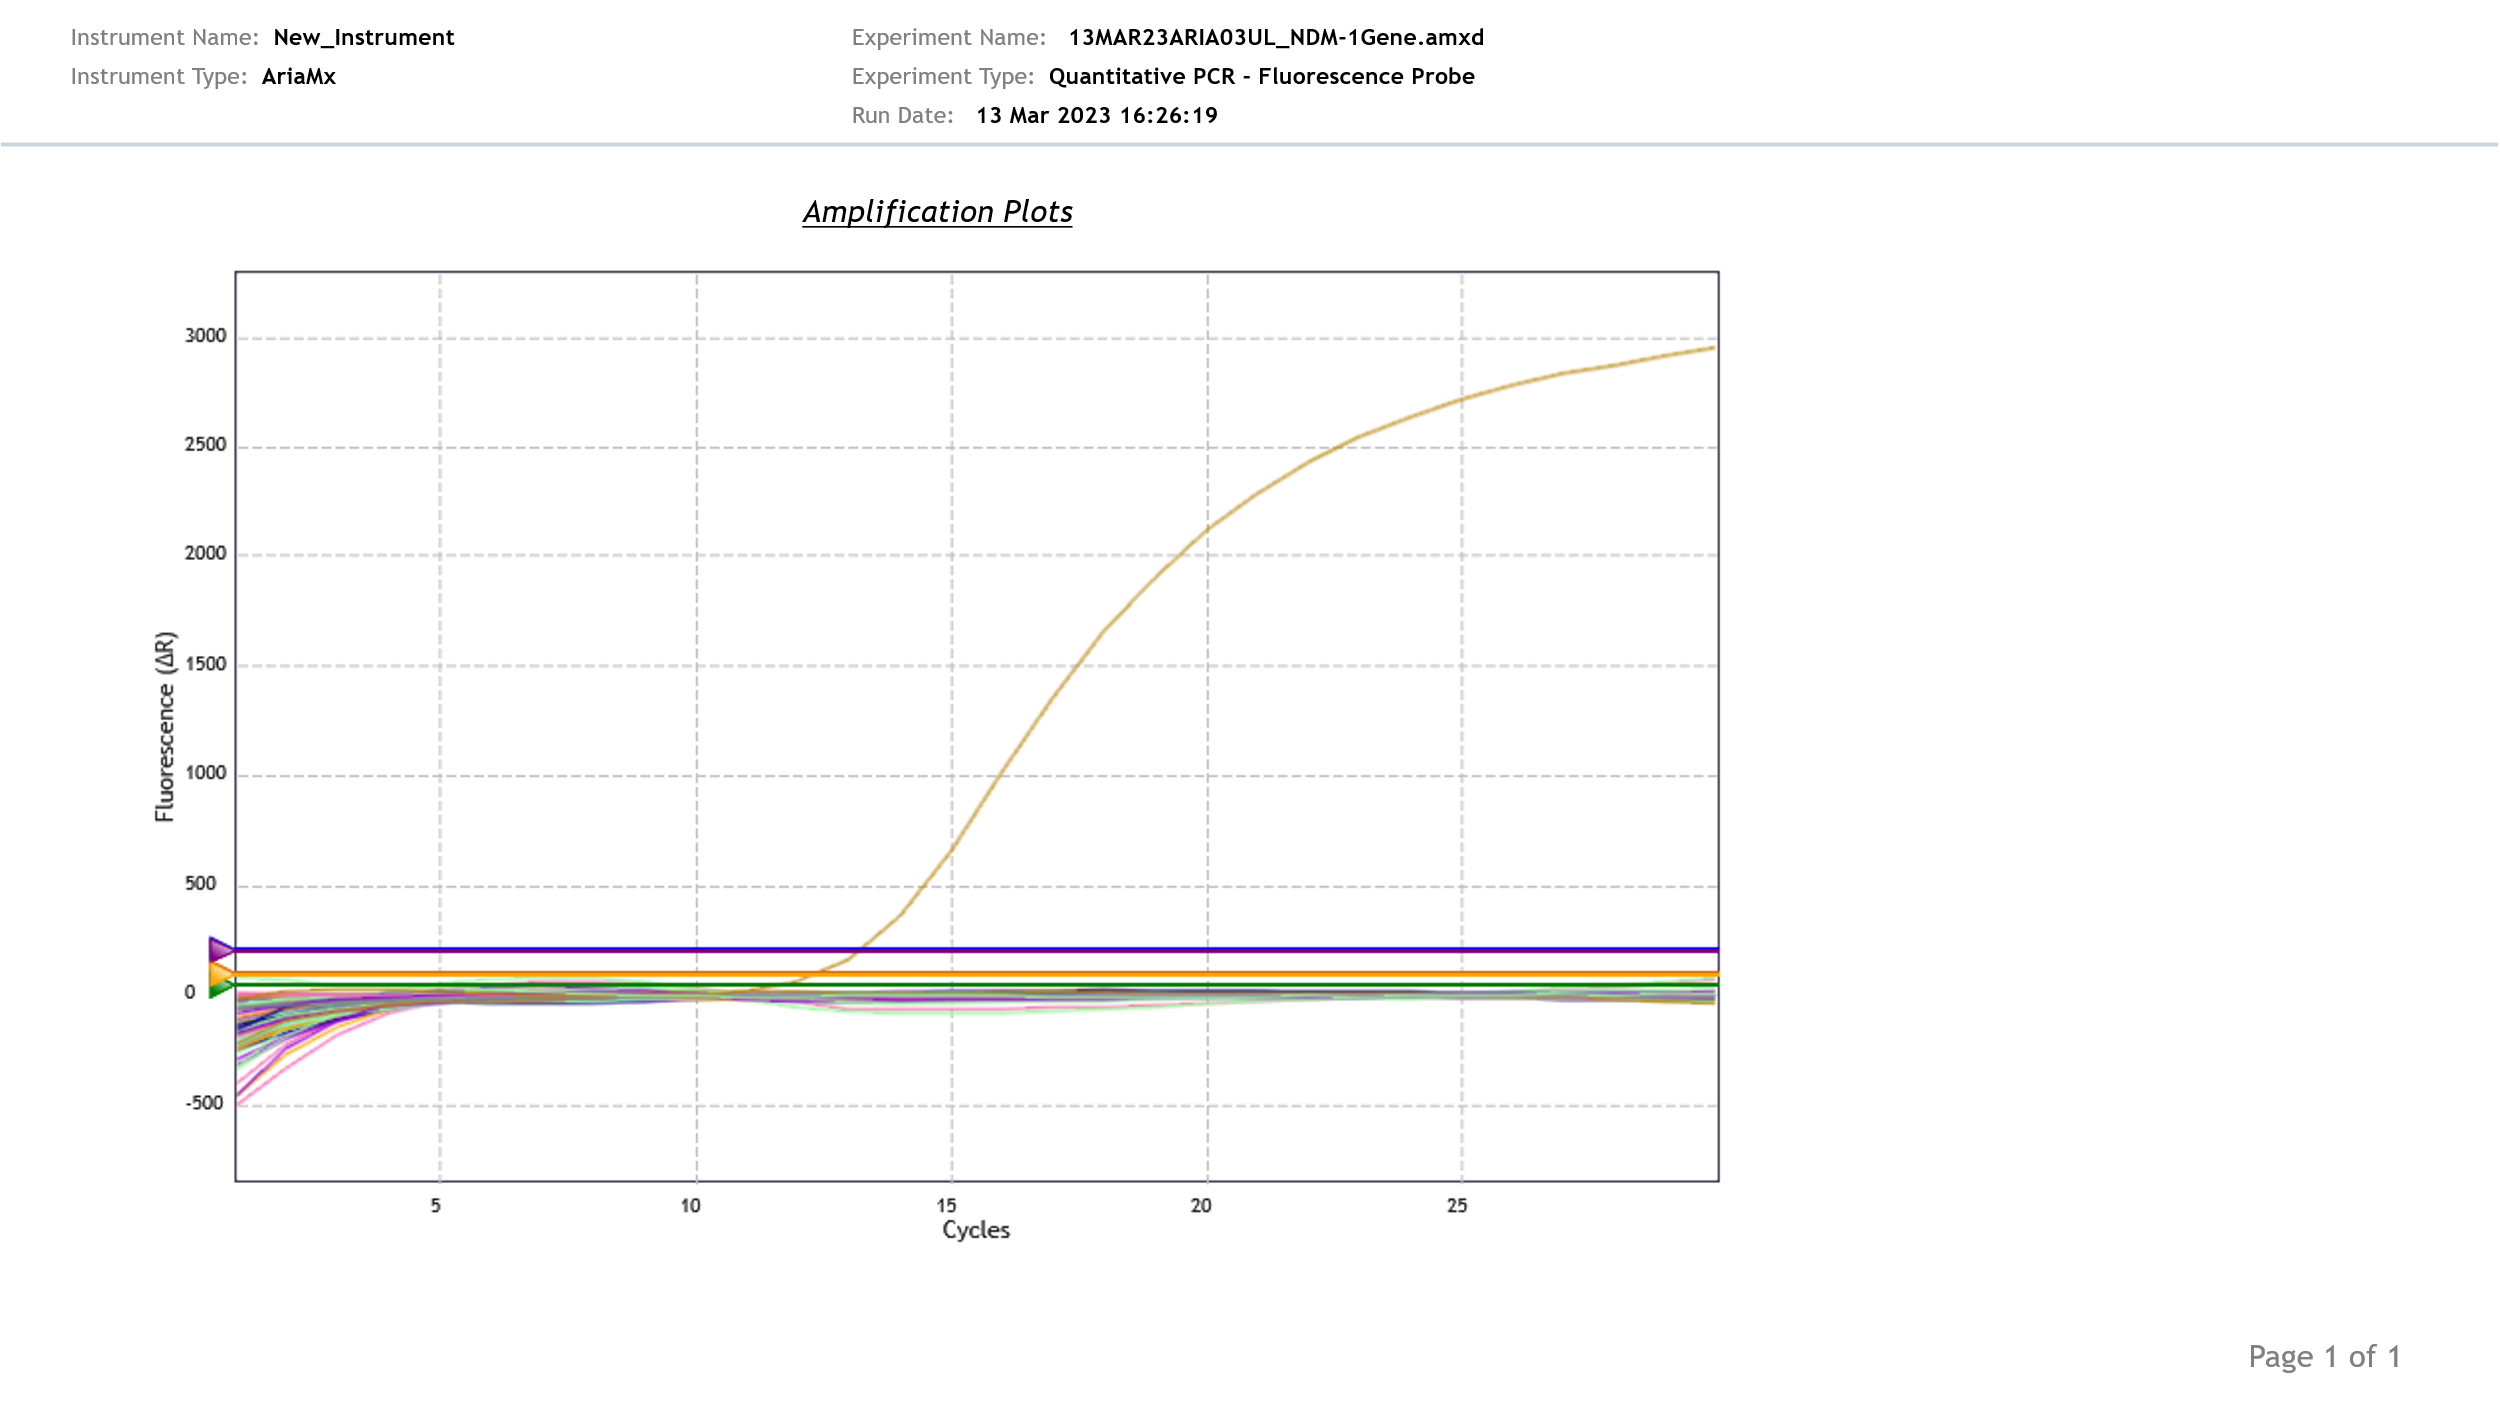


References

1. Lund M, Petersen MB, Jørgensen AL, Paulmann D, Wang M. Rapid real-time PCR for the detection of IMP, NDM, VIM, KPC and OXA-48 carbapenemase genes in isolates and spiked stool samples. Diagn Microbiol Infect Dis. 2018;92:8–12. https://doi.org/10.1016/j.diagmicrobio.2018.04.002.
